# Supplementary material for: Natural genetic variation shapes root system responses to phytohormones in Arabidopsis
Source: PubMed Central journal article supplement (PMC6220887; doi:10.1111/tpj.14034), 2018-09-10
Supplement: TPJ-96-468-s001.pdf [file TPJ-96-468-s001.pdf]

A.

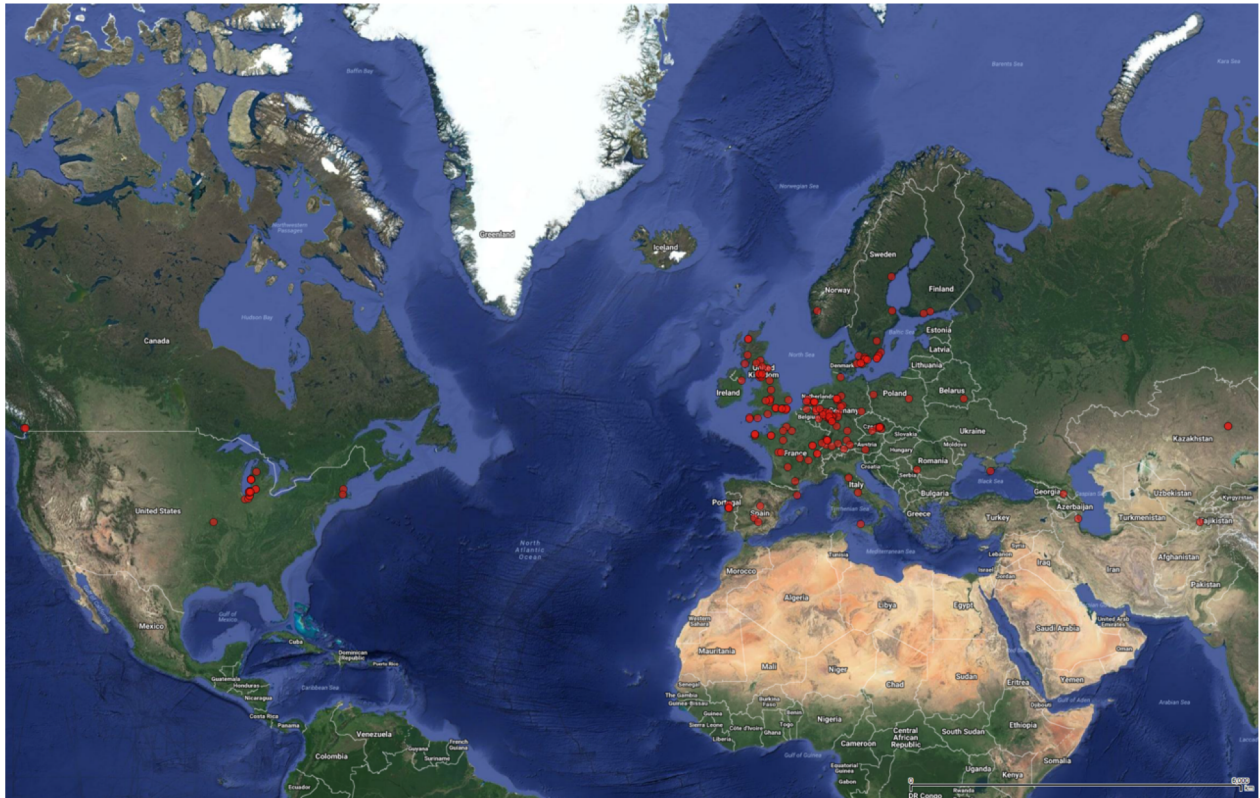

B.

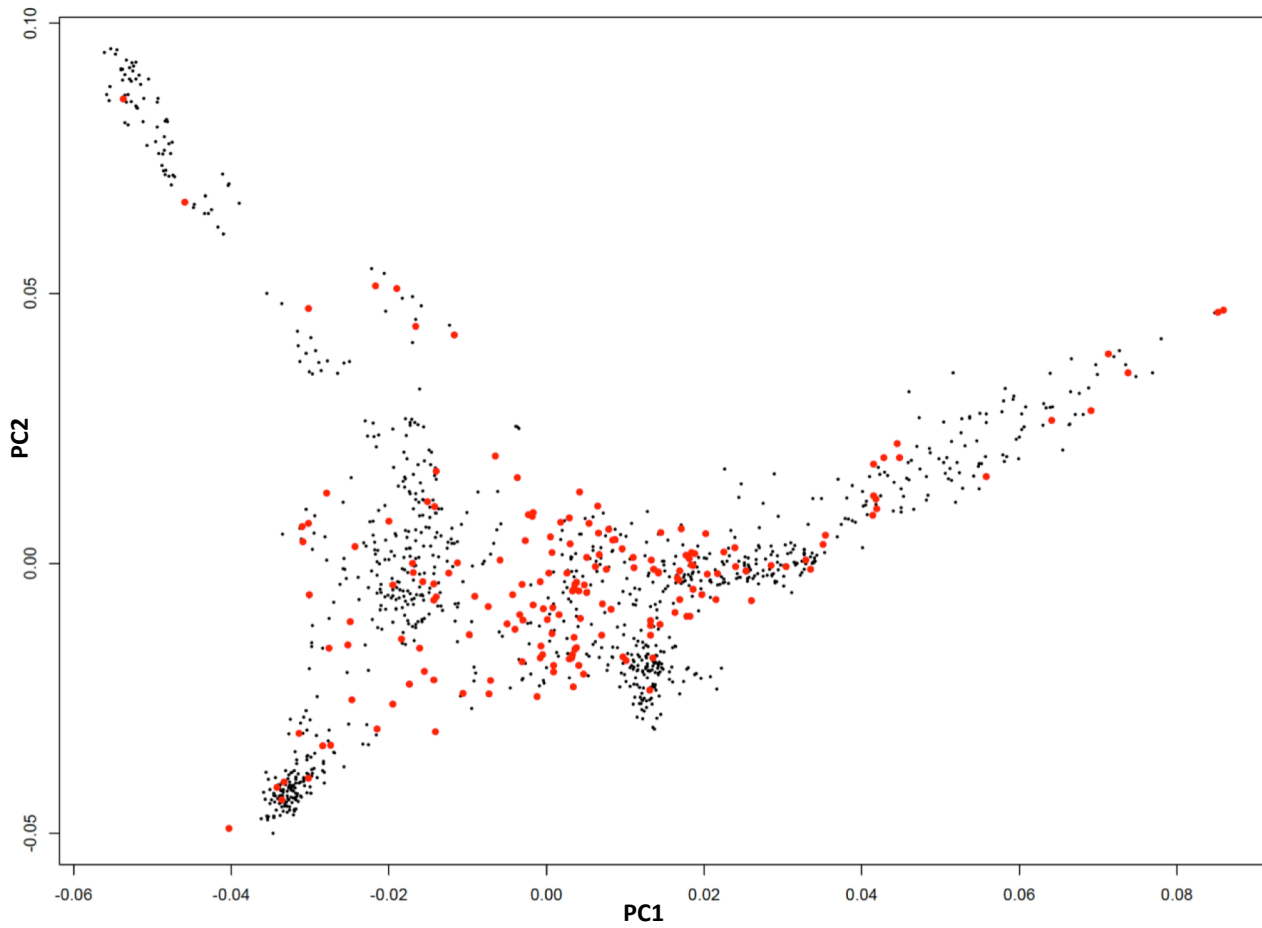

Supplemental Figure 1

A.

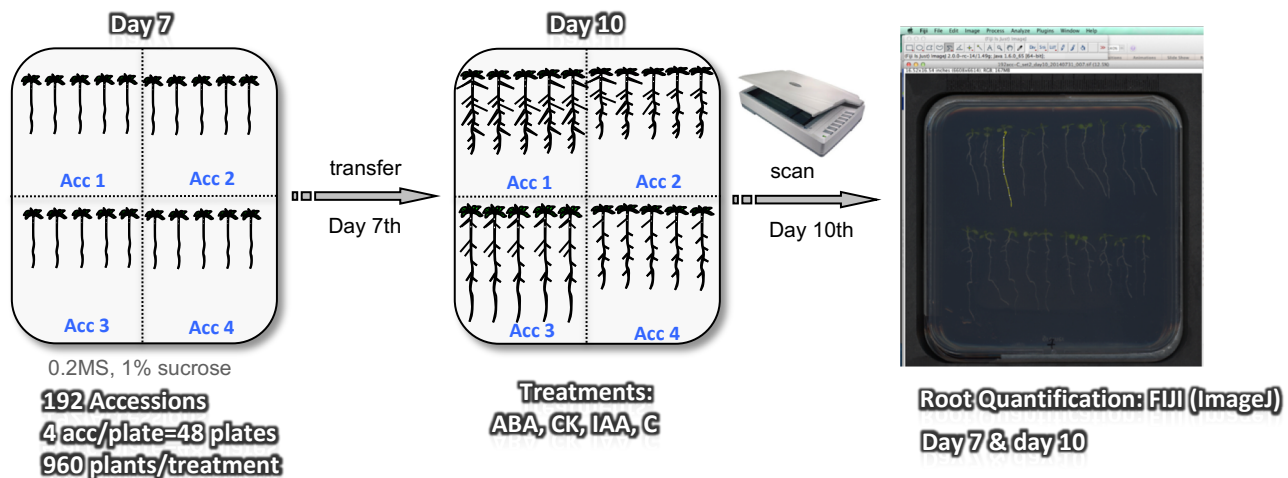

B.

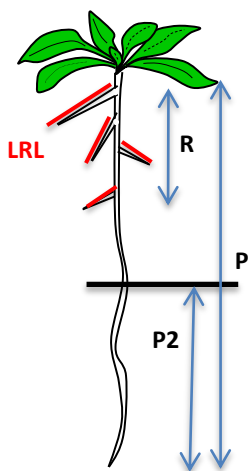

C.

| Short Symbol of Trait | Name of Trait                  | Formula        |
|-----------------------|--------------------------------|----------------|
| P                     | Primary root length            | -              |
| P2                    | Growth of P after the transfer | -              |
| R                     | Branching zone                 | -              |
| LRL                   | Average lateral root length    | -              |
| LR.No                 | Lateral root numbers           | -              |
| TLRL                  | Total lateral root length      | $LR.L * LR.No$ |
| TRL                   | Total root length              | $TLRL + P$     |
| LRD_P                 | Root density in P              | $LR.No / P$    |
| LRD_R                 | Root density in R              | $LR.No / R$    |
| LRR                   | Length ratio                   | $TLRL / P$     |

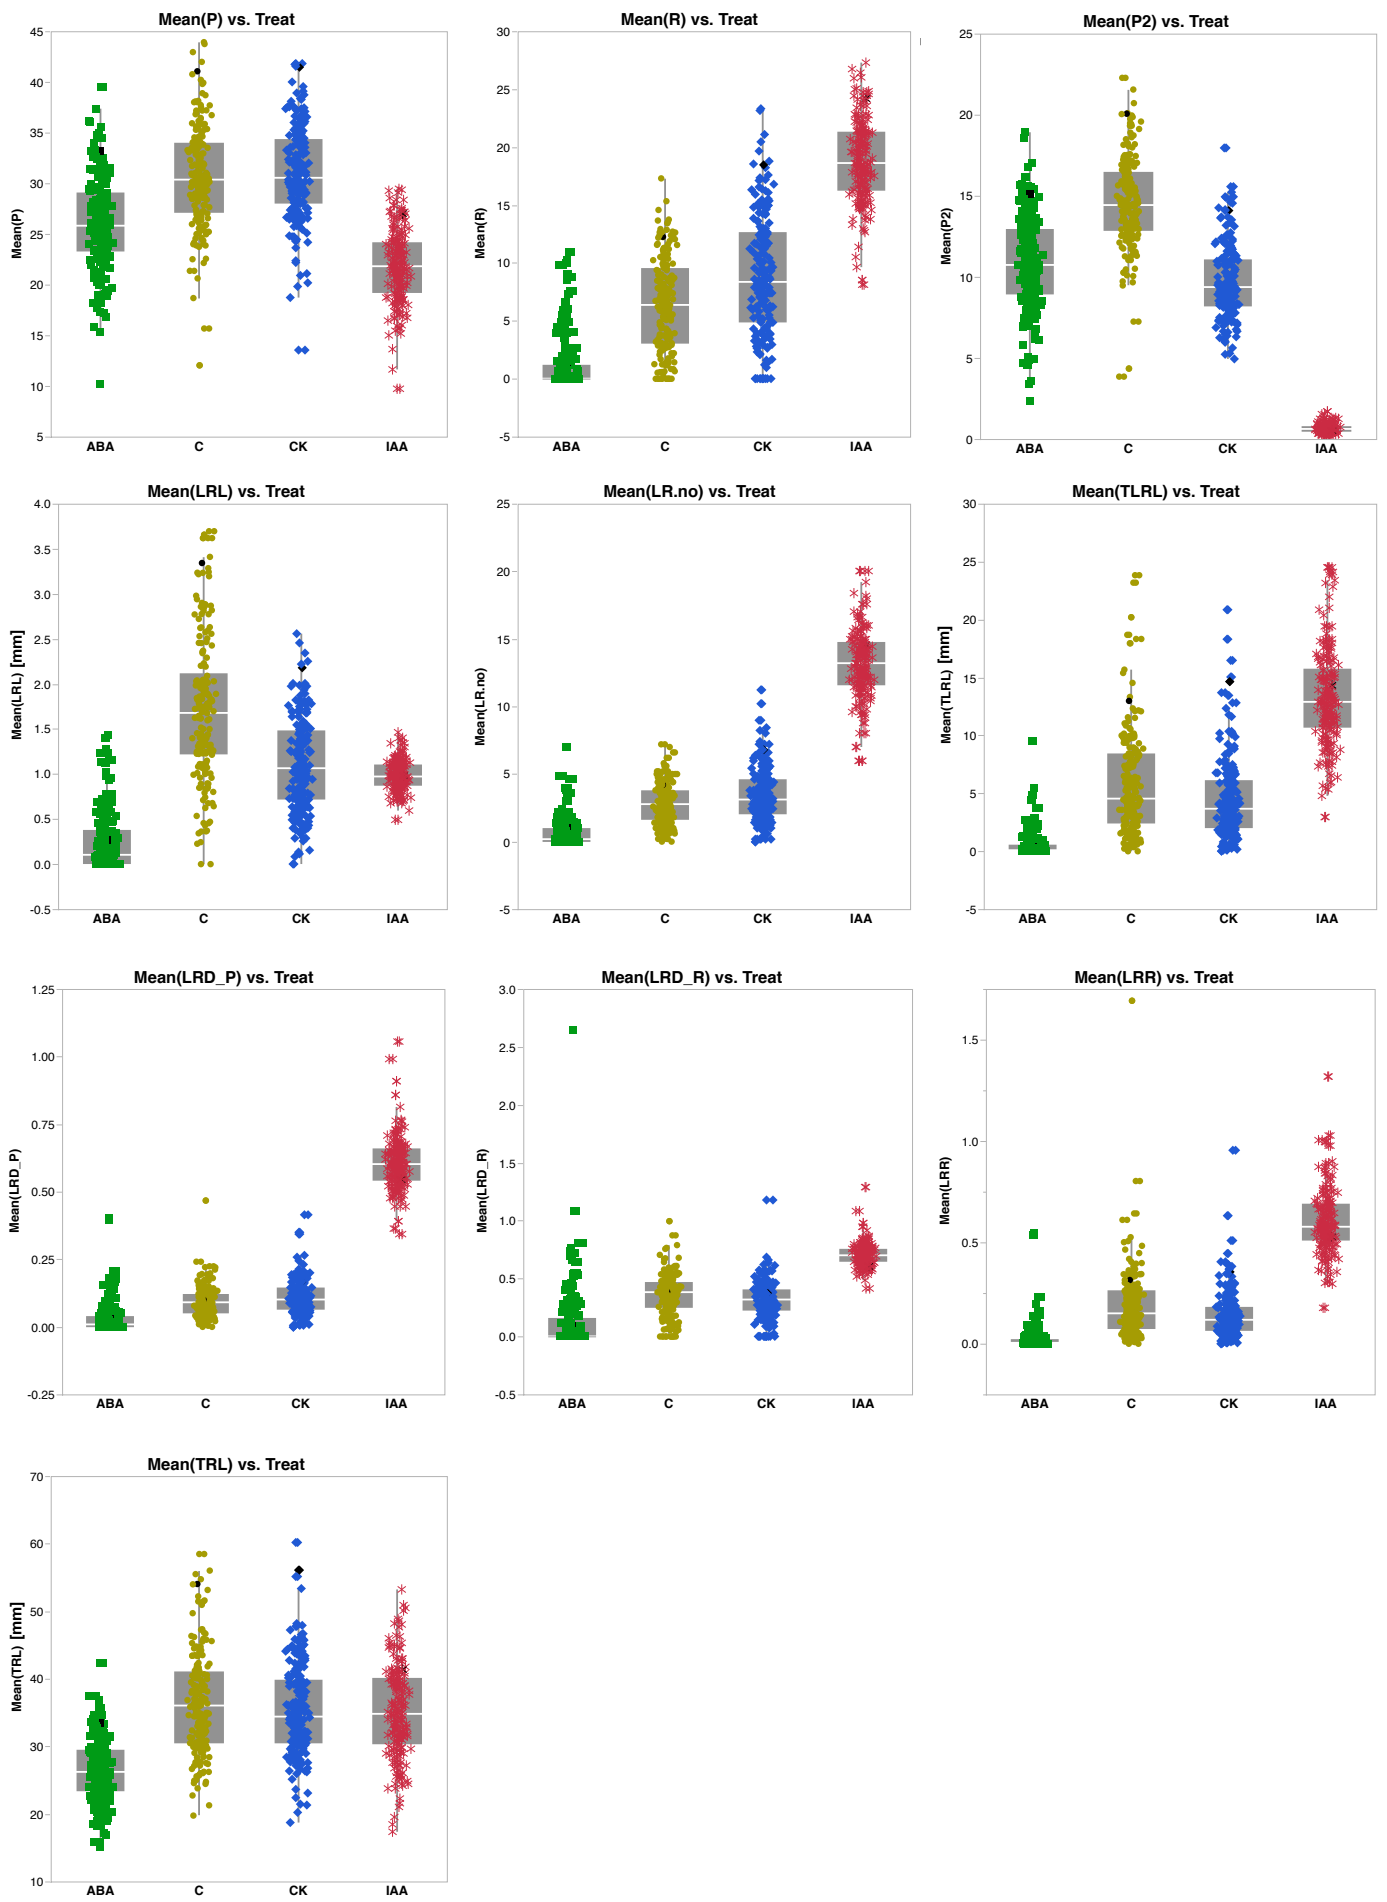

Supplemental Figure 3

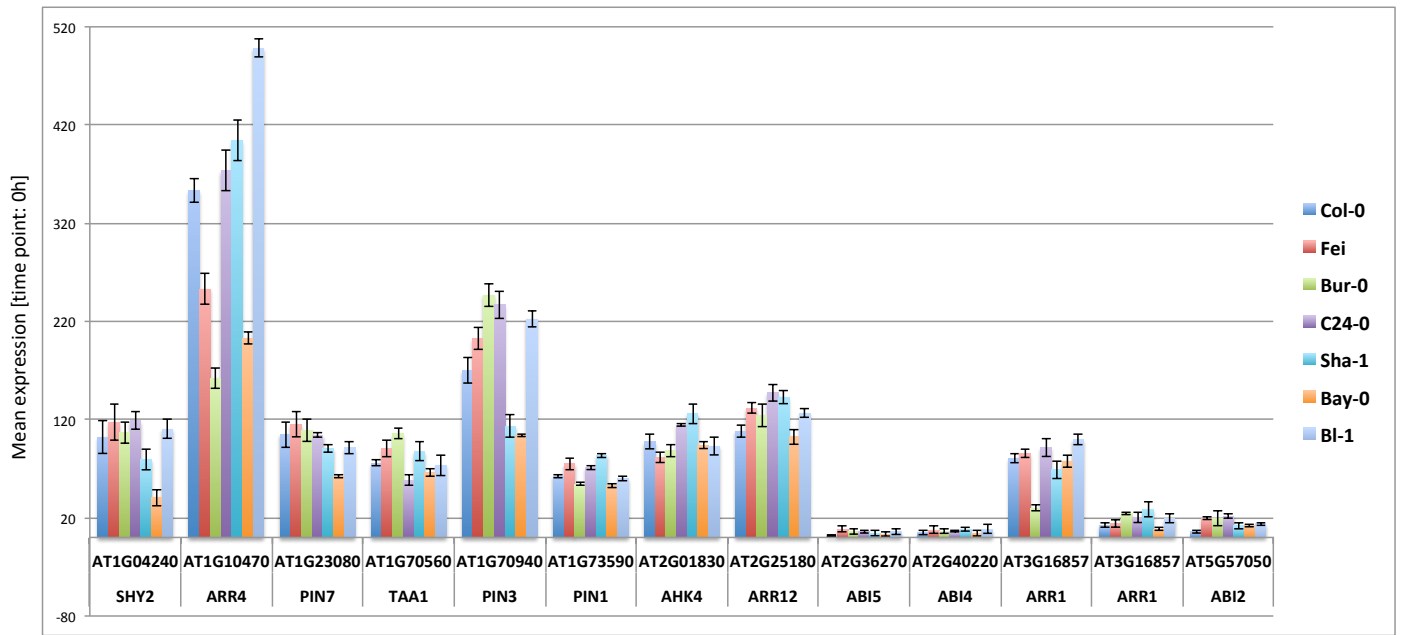

Supplemental Figure 4

Ch.3, 6127399

AT3G17860  
AT3G17880  
AT3G17890  
AT3G17900  
AT3G17910  
AT3G17920

Ch.3, 18730847

AT3G50450  
AT3G50460  
AT3G50470  
AT3G50480  
AT3G50490

Ch.5, 25847727

AT5G64667  
AT5G64670  
AT5G64680  
AT5G64685

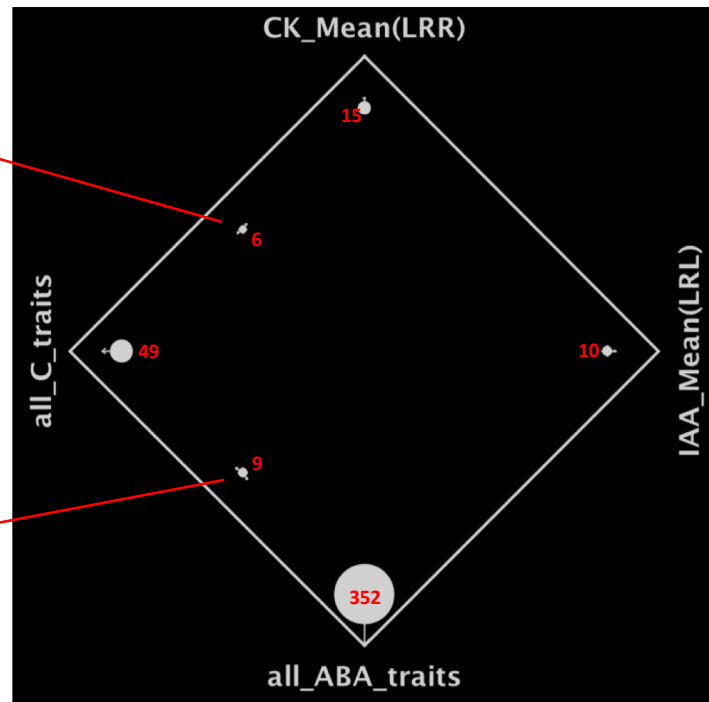

Supplemental Figure 5

A

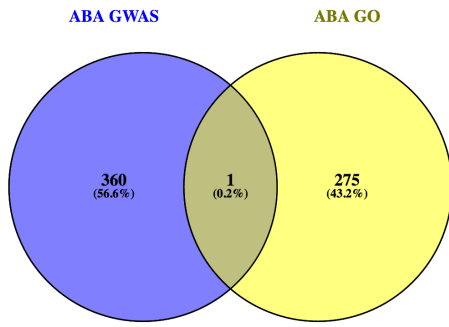

B

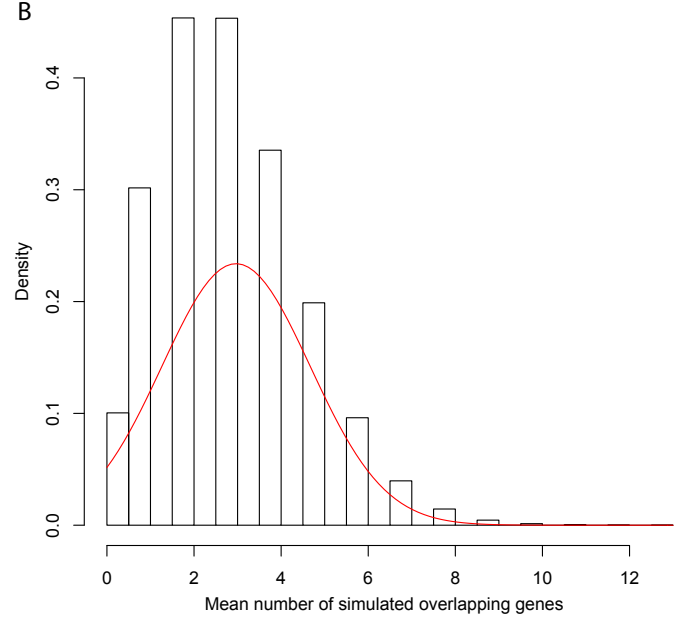

**A.**

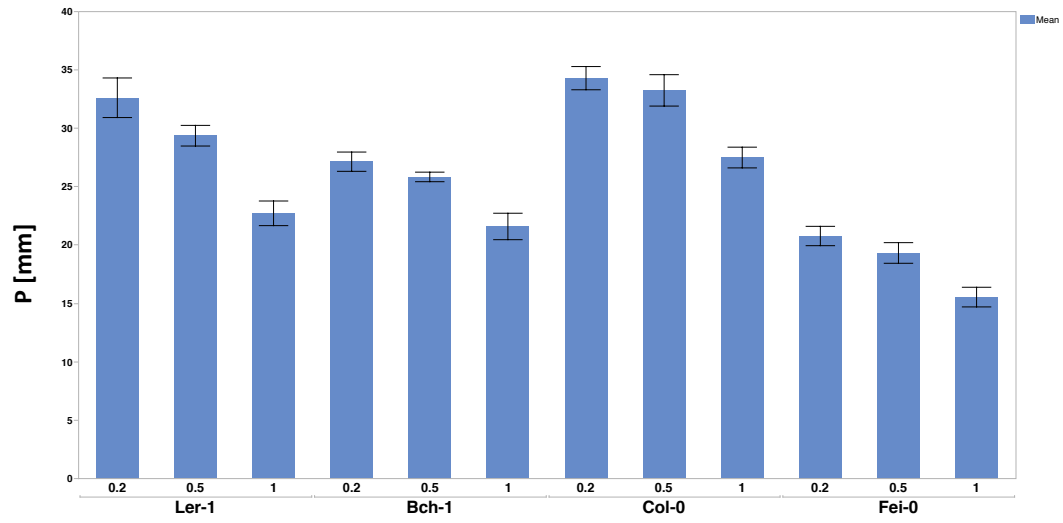

**B.**

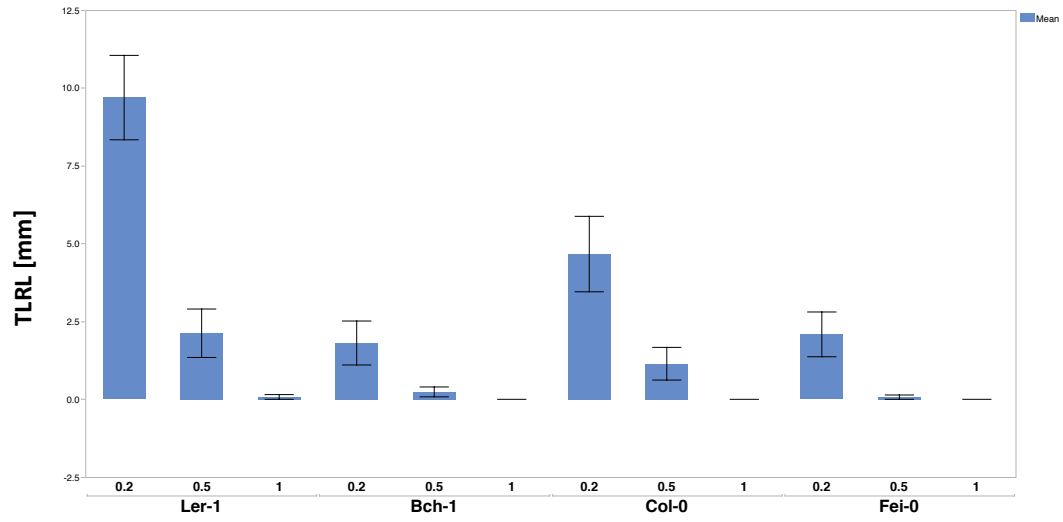

**C.**

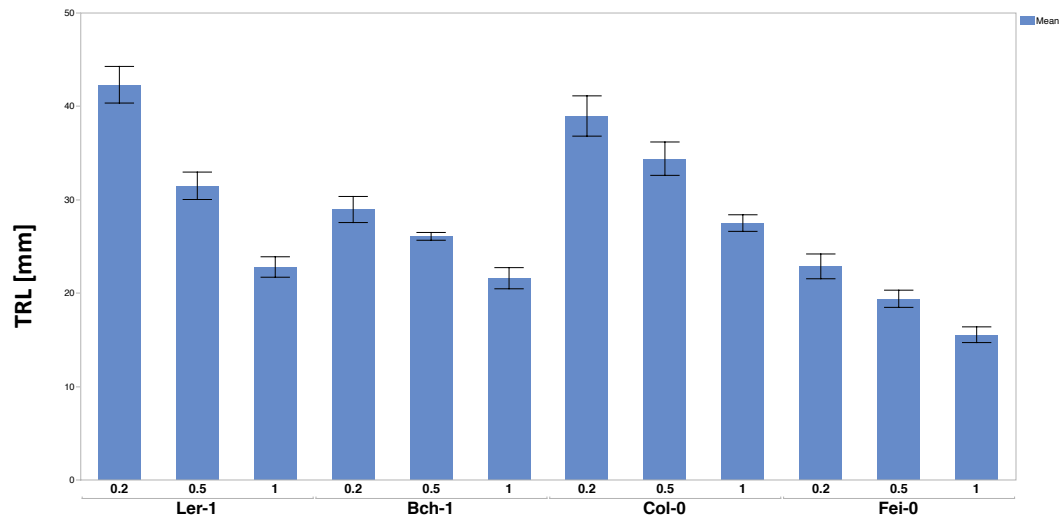

**Supplemental Figure 7**







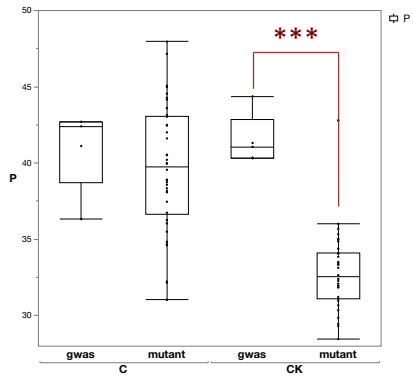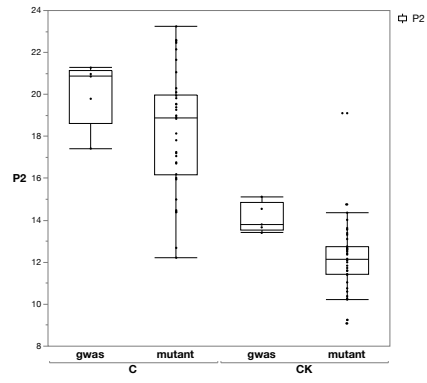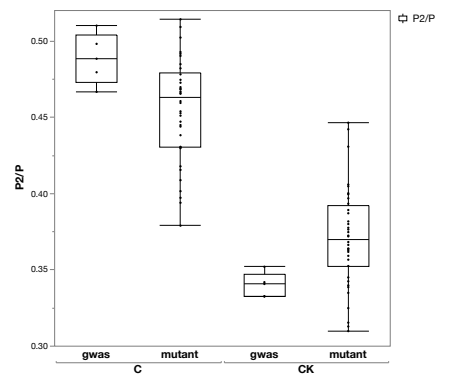

Supplemental Figure 10

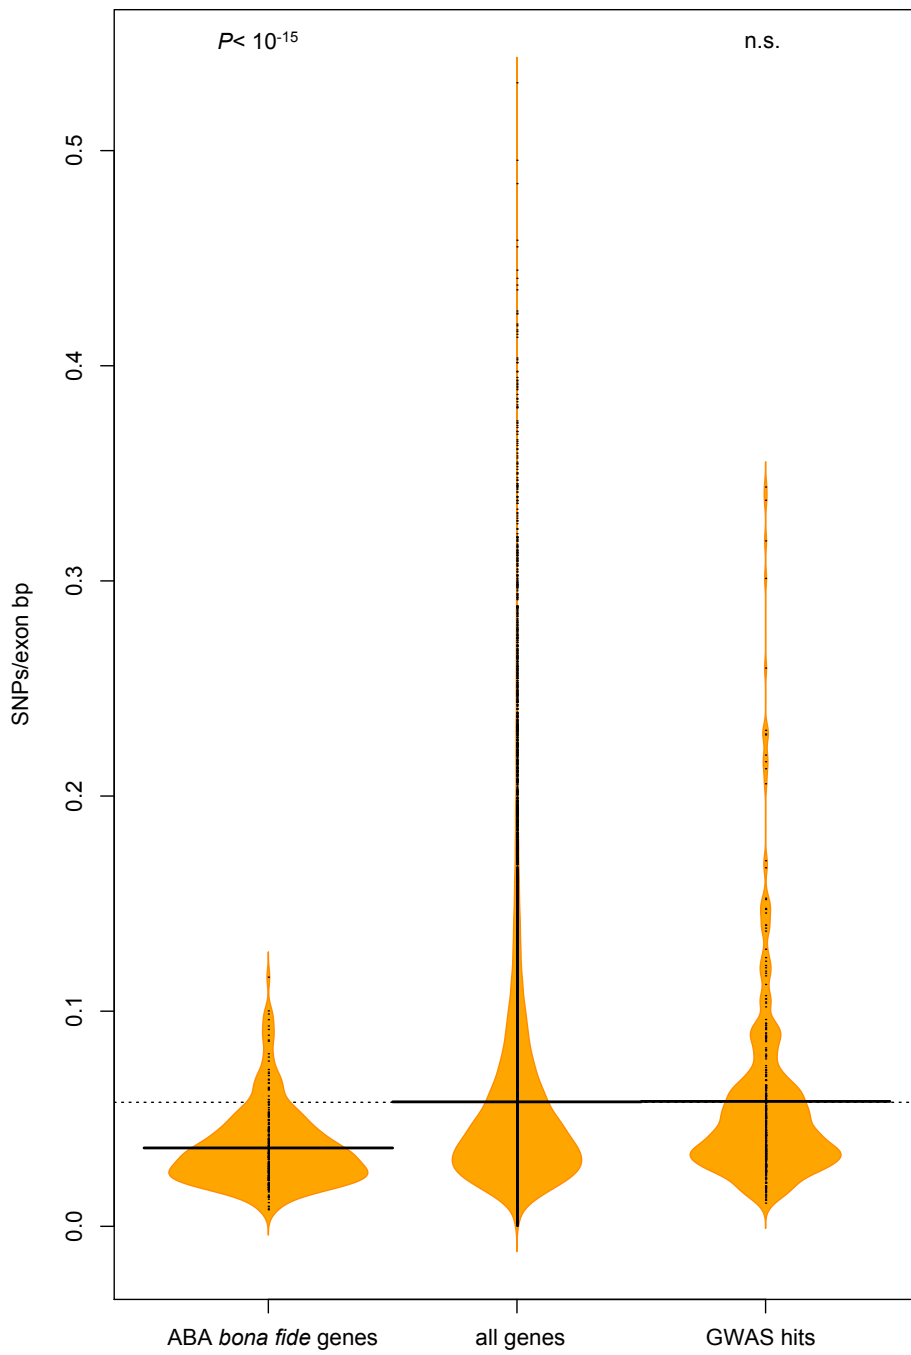

Supplemental Figure 11
